# Supplementary material for: Organ-specific metastatic landscape dissects PD-(L)1 blockade efficacy in advanced non-small cell lung cancer: applicability from clinical trials to real-world practice
Source: PubMed Central journal article supplement (PMC9004108; doi:10.1186/s12916-022-02315-2), 2022-04-12

## Category I organs (Adrenal gland / Brain / Liver)

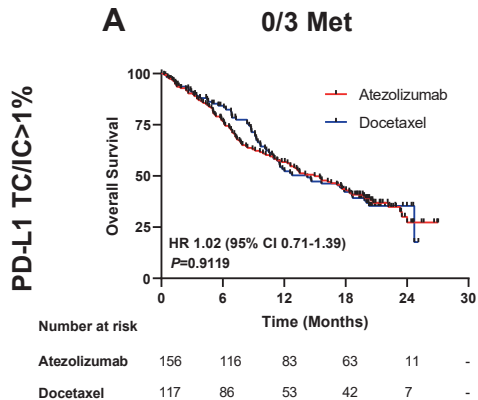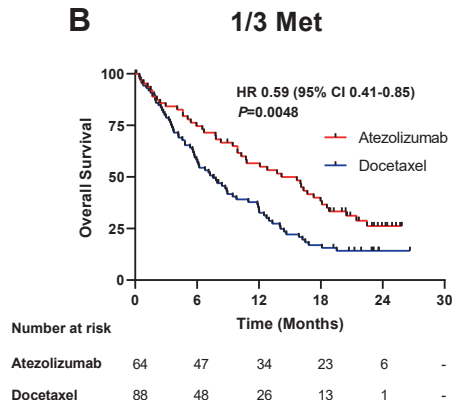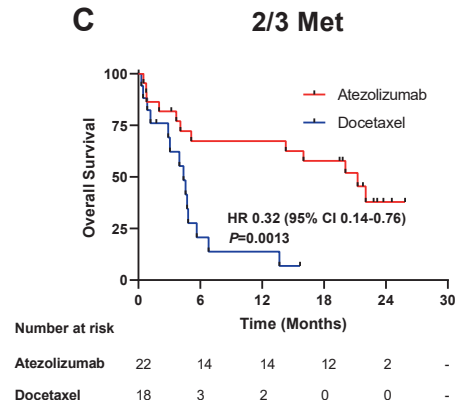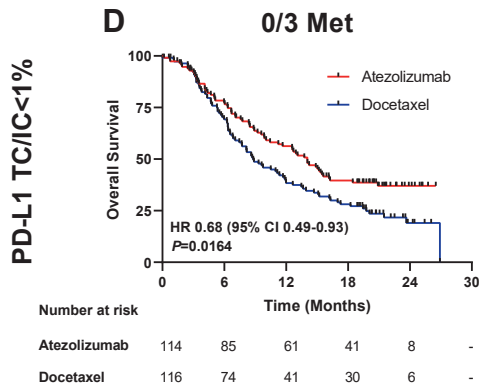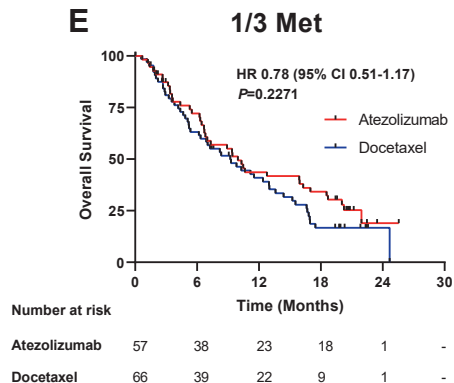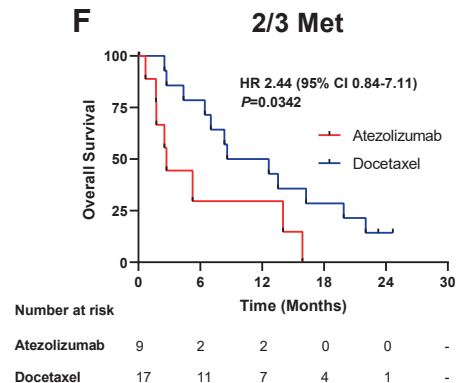

Supplement: 12916_2022_2315_MOESM4_ESM.pdf [file 12916_2022_2315_MOESM4_ESM.pdf]
