# Supplementary material for: Organ-specific metastatic landscape dissects PD-(L)1 blockade efficacy in advanced non-small cell lung cancer: applicability from clinical trials to real-world practice
Source: PubMed Central journal article supplement (PMC9004108; doi:10.1186/s12916-022-02315-2), 2022-04-12
Supplement: 12916_2022_2315_MOESM5_ESM.pdf [file 12916_2022_2315_MOESM5_ESM.pdf]

## Category I organs (Adrenal gland / Brain / Liver)

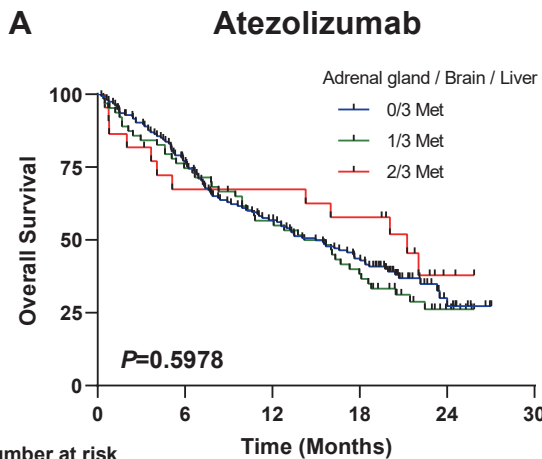

|                | 0   | 6   | 12 | 18 | 24 | 30 |
|----------------|-----|-----|----|----|----|----|
| Number at risk |     |     |    |    |    |    |
| 0/3 Met        | 156 | 116 | 83 | 63 | 11 | -  |
| 1/3 Met        | 64  | 47  | 34 | 23 | 6  | -  |
| 2/3 Met        | 22  | 14  | 14 | 12 | 2  | -  |

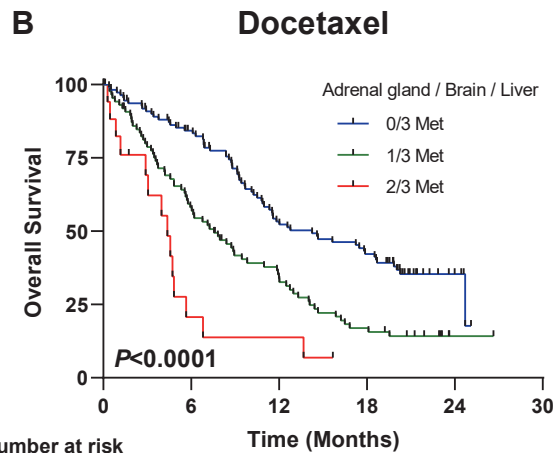

|                | 0   | 6  | 12 | 18 | 24 | 30 |
|----------------|-----|----|----|----|----|----|
| Number at risk |     |    |    |    |    |    |
| 0/3 Met        | 117 | 86 | 53 | 42 | 7  | -  |
| 1/3 Met        | 88  | 48 | 26 | 13 | 1  | -  |
| 2/3 Met        | 18  | 3  | 2  | 0  | 0  | -  |

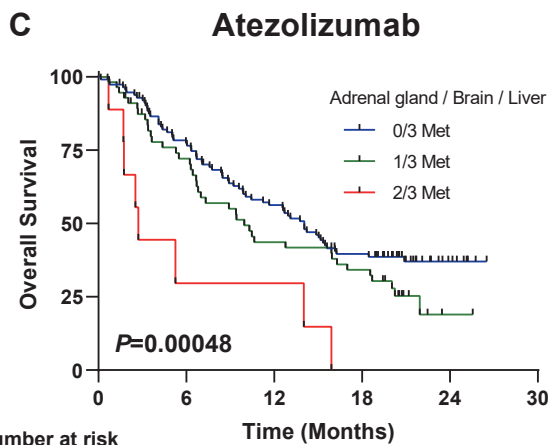

|                | 0   | 6  | 12 | 18 | 24 | 30 |
|----------------|-----|----|----|----|----|----|
| Number at risk |     |    |    |    |    |    |
| 0/3 Met        | 114 | 85 | 61 | 41 | 8  | -  |
| 1/3 Met        | 57  | 38 | 23 | 18 | 1  | -  |
| 2/3 Met        | 9   | 2  | 2  | 0  | 0  | -  |

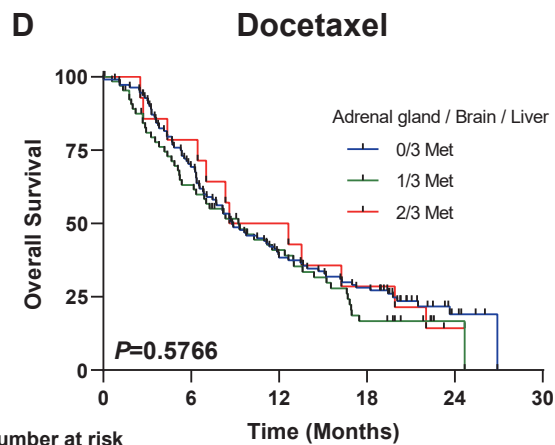

|                | 0   | 6  | 12 | 18 | 24 | 30 |
|----------------|-----|----|----|----|----|----|
| Number at risk |     |    |    |    |    |    |
| 0/3 Met        | 116 | 74 | 41 | 30 | 6  | -  |
| 1/3 Met        | 66  | 39 | 22 | 9  | 1  | -  |
| 2/3 Met        | 17  | 11 | 7  | 4  | 1  | -  |
