# Supplementary material for: Organ-specific metastatic landscape dissects PD-(L)1 blockade efficacy in advanced non-small cell lung cancer: applicability from clinical trials to real-world practice
Source: PubMed Central journal article supplement (PMC9004108; doi:10.1186/s12916-022-02315-2), 2022-04-12
Supplement: 12916_2022_2315_MOESM8_ESM.pdf [file 12916_2022_2315_MOESM8_ESM.pdf]

### A IMvigor211 PD-L1 negative patients with liver metastases

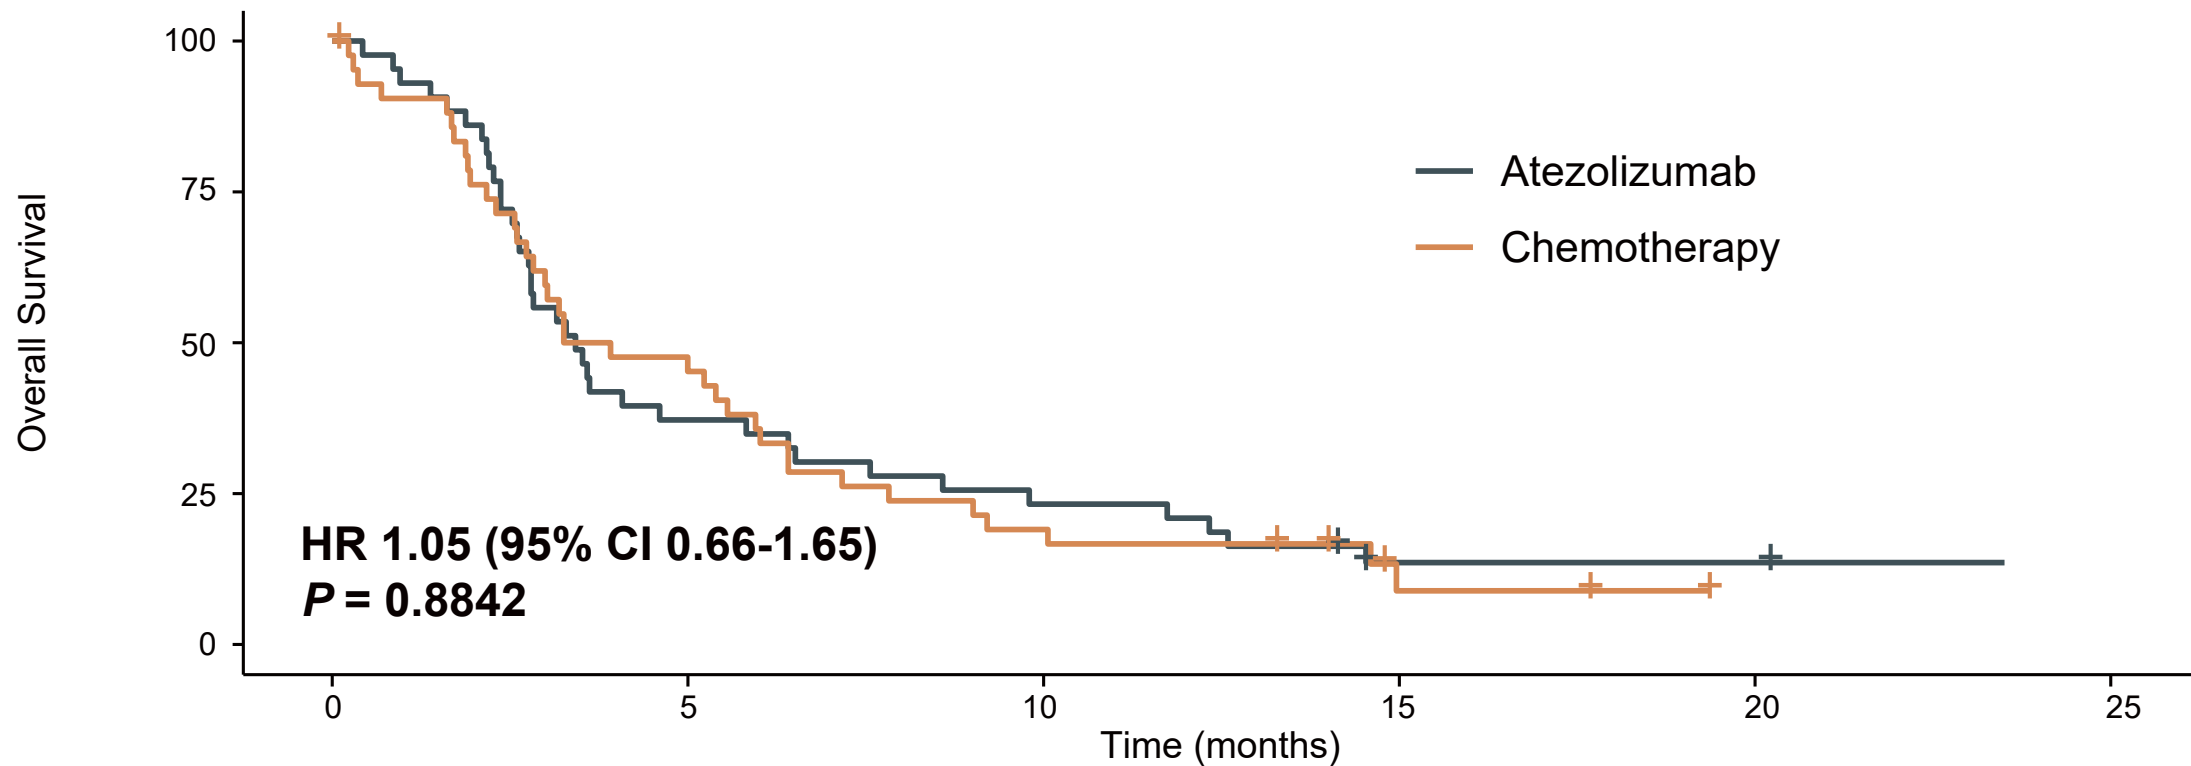

Number at risk

|              |    |    |    |   |   |   |
|--------------|----|----|----|---|---|---|
| Atezolizumab | 43 | 16 | 10 | 4 | 4 | 0 |
| Chemotherapy | 43 | 19 | 8  | 2 | 0 | 0 |

### B IMvigor210 patients with liver metastases

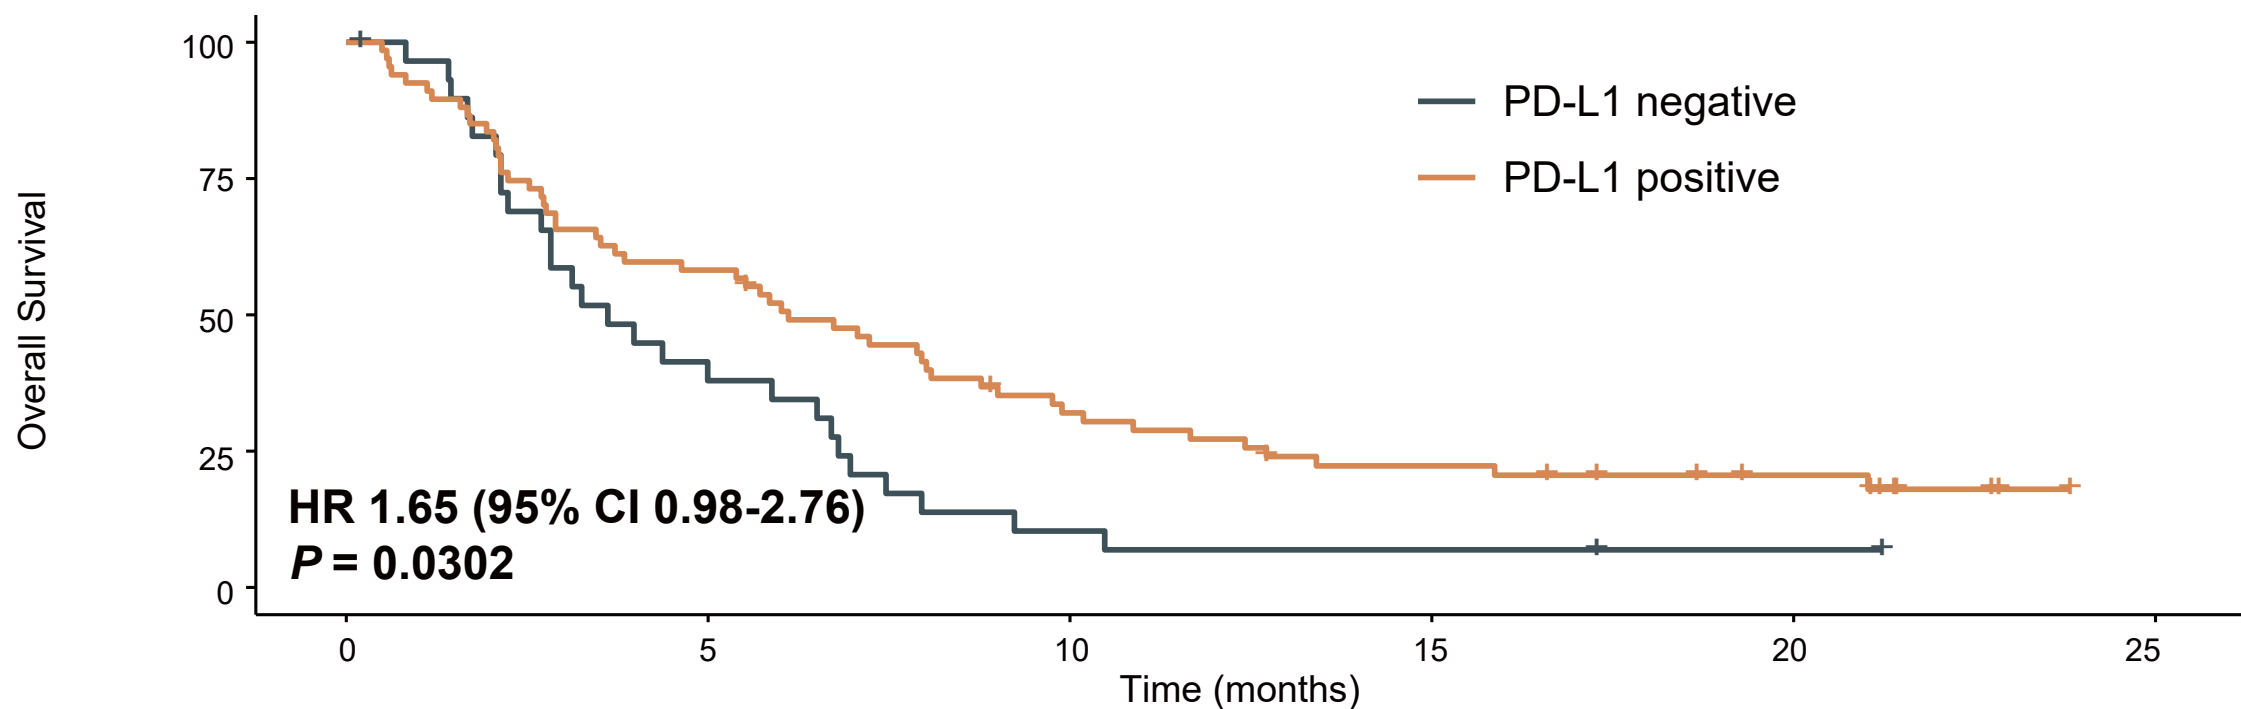

Number at risk

|                |    |    |    |    |   |   |
|----------------|----|----|----|----|---|---|
| PD-L1 negative | 30 | 11 | 3  | 2  | 1 | 0 |
| PD-L1 positive | 67 | 39 | 20 | 13 | 8 | 0 |
